# Supplementary material
Source: publisher site journal article supplement (https://www.kjim.org/upload/media/kjim-2025-171-Supplementary-Table-18.pdf)
Supplement: Supplementary file 1 [file kjim-2025-171-Supplementary-Table-18.pdf]

**Supplementary Table 18. Time persistence effect on chronic hepatitis development following zoster vaccination**

| Time (yr)    | Events, n (%) | aHR (95% CI)                      |                                   |
|--------------|---------------|-----------------------------------|-----------------------------------|
|              |               | Model 1 <sup>a)</sup>             | Model 2 <sup>b)</sup>             |
| < 1          |               |                                   |                                   |
| Unvaccinated | 5,306 (0.73)  | 1.0 (reference)                   | 1.0 (reference)                   |
| Vaccinated   | 4,637 (0.63)  | 0.87 (0.84 to 0.91) <sup>c)</sup> | 0.86 (0.83 to 0.90) <sup>c)</sup> |
| 1–2          |               |                                   |                                   |
| Unvaccinated | 5,171 (0.71)  | 1.0 (reference)                   | 1.0 (reference)                   |
| Vaccinated   | 4,181 (0.57)  | 0.81 (0.77 to 0.84) <sup>c)</sup> | 0.80 (0.77 to 0.83) <sup>c)</sup> |
| 2–4          |               |                                   |                                   |
| Unvaccinated | 7,949 (1.09)  | 1.0 (reference)                   | 1.0 (reference)                   |
| Vaccinated   | 6,038 (0.83)  | 0.79 (0.76 to 0.82) <sup>c)</sup> | 0.79 (0.76 to 0.82) <sup>c)</sup> |
| 4–6          |               |                                   |                                   |
| Unvaccinated | 4,227 (0.58)  | 1.0 (reference)                   | 1.0 (reference)                   |
| Vaccinated   | 2,965 (0.41)  | 0.80 (0.77 to 0.85) <sup>c)</sup> | 0.80 (0.76 to 0.84) <sup>c)</sup> |
| 6–8          |               |                                   |                                   |
| Unvaccinated | 1,072 (0.15)  | 1.0 (reference)                   | 1.0 (reference)                   |
| Vaccinated   | 759 (0.10)    | 0.89 (0.81 to 0.97) <sup>c)</sup> | 0.84 (0.76 to 0.92) <sup>c)</sup> |
| ≥ 8          |               |                                   |                                   |
| Unvaccinated | 40 (0.01)     | 1.0 (reference)                   | 1.0 (reference)                   |
| Vaccinated   | 19 (0.003)    | 0.65 (0.38 to 1.13)               | 0.63 (0.36 to 1.10)               |

aHR, adjusted hazard ratio; CI, confidence interval.

<sup>a)</sup>Models 1: adjusted for age (50–54, 55–59, 60–64, and ≥ 65 years) and sex.

<sup>b)</sup>Model 2: adjusted for age (50–54, 55–59, 60–64, and ≥ 65 years); sex; household income (low income, middle income, and high income); region of residence (urban and rural); Charlson comorbidity index (0, 1, and ≥ 2); obesity (underweight [ $< 18.5 \text{ kg/m}^2$ ], normal [ $18.5\text{--}22.9 \text{ kg/m}^2$ ], overweight [ $23.0\text{--}24.9 \text{ kg/m}^2$ ], and obese [ $\geq 25.0 \text{ kg/m}^2$ ]); blood pressure (systolic blood pressure  $< 140 \text{ mmHg}$  and diastolic blood pressure  $< 90 \text{ mmHg}$  and systolic blood pressure  $\geq 140 \text{ mmHg}$  or diastolic blood pressure  $\geq 90 \text{ mmHg}$ ); fasting blood glucose ( $< 100$  and  $\geq 100 \text{ mg/dL}$ ); glomerular filtration rate ( $< 60$ ,  $60\text{--}89$ , and  $\geq 90 \text{ mL/min/1.73 m}^2$ ); smoking status (non-, ex-, and current smoker); alcohol consumption (drinks;  $< 1$ ,  $1\text{--}2$ ,  $3\text{--}4$ , and  $\geq 5$  days per week); aerobic physical activity (sufficient and insufficient); and history of medication use for coronary artery disease, diabetes mellitus, dyslipidemia, and hypertension.

<sup>c)</sup>Significant differences ( $p < 0.05$ ).
